# Supplementary material for: Paucity of Intact Non-Induced Provirus with Early, Long-Term Antiretroviral Therapy of Perinatal HIV Infection
Source: PubMed Central journal article supplement (PMC5298215; doi:10.1371/journal.pone.0170548), 2017-02-08

# Plasma viral loads over time

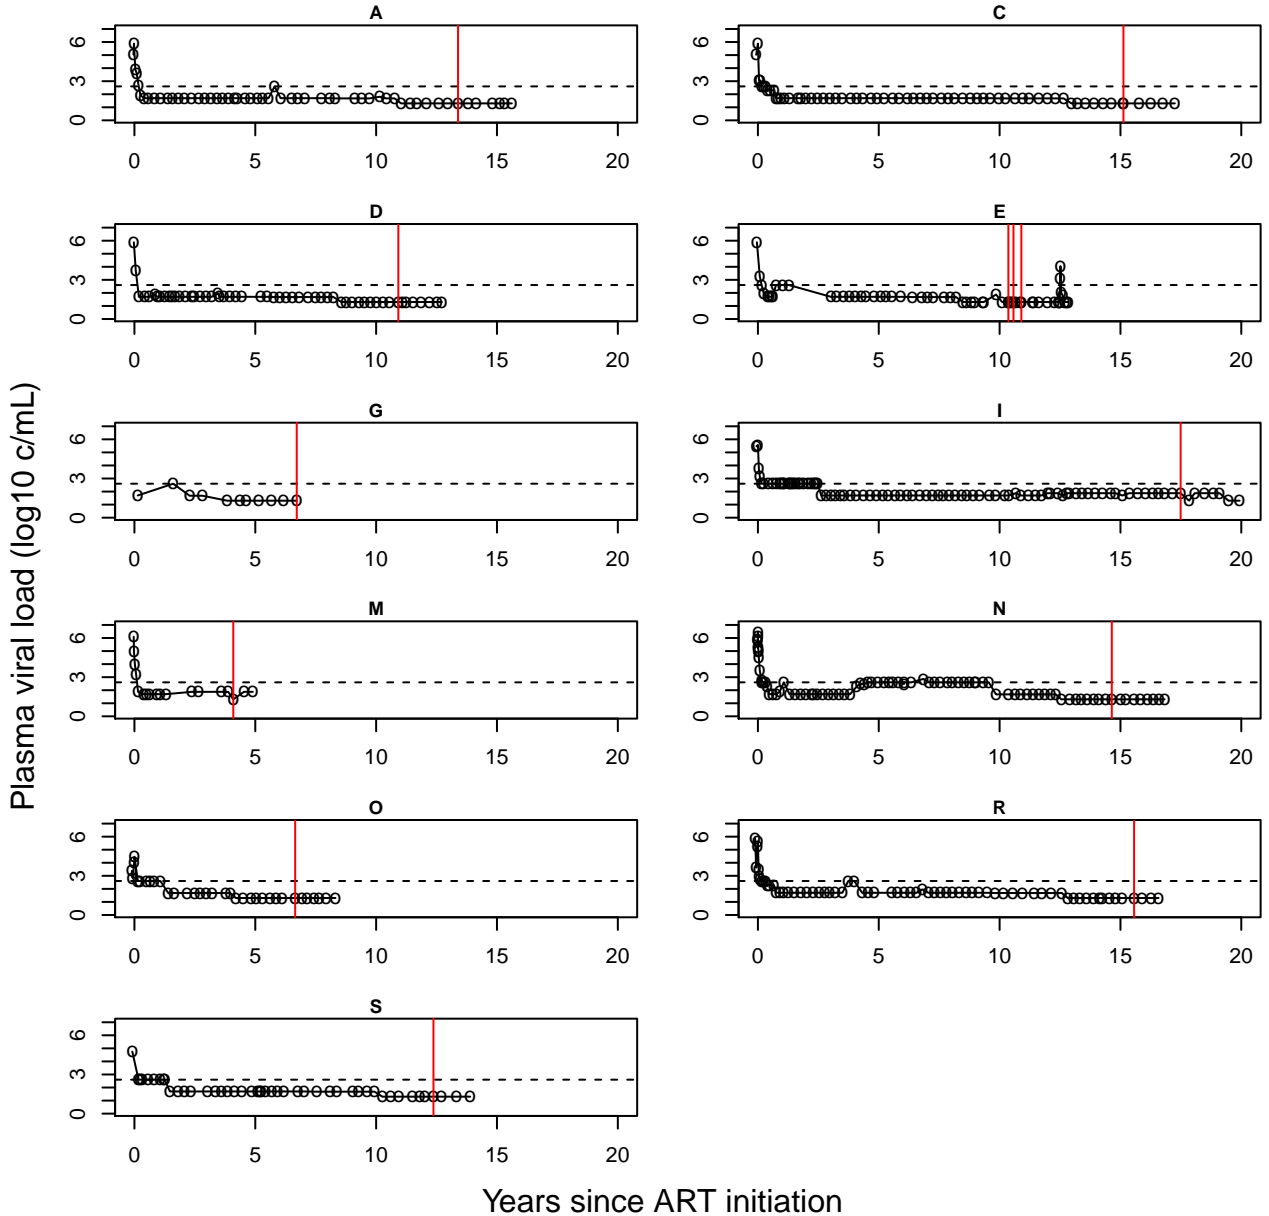

Supplement: pone.0170548.s001.pdf [file pone.0170548.s001.pdf]
